# Supplementary material
Source: PubMed Central journal article supplement (PMC3463764)
Supplement: NIHMS398905-supplement-Supp_Table_S1-S6.pdf [file NIHMS398905-supplement-Supp_Table_S1-S6.pdf]

# **Comparative mass spectrometric analysis of neural adaptations in rats repeatedly exposed to amphetamine**

Elena V. Romanova,<sup>1</sup> Ji Eun Lee,<sup>1,5</sup> Neil L. Kelleher,<sup>2</sup> Jonathan V. Sweedler<sup>1, 3\*</sup>  
and Joshua M. Gulley<sup>3,4\*</sup>

<sup>1</sup>Department of Chemistry and the Beckman Institute, University of Illinois at Urbana-Champaign, 600 S. Mathews Ave., Urbana, IL 61801, USA

<sup>2</sup>Department of Chemistry, Department of Molecular Biosciences, and The Chemistry of Life Processes Institute, Northwestern University, 2145 Sheridan Rd., Evanston, IL USA

<sup>3</sup>Neuroscience Program, University of Illinois at Urbana-Champaign, 505 South Goodwin Avenue, Urbana, IL 61801, USA

<sup>4</sup>Department of Psychology, University of Illinois at Urbana-Champaign, 603 E. Daniel St., Champaign, IL 61820, USA

<sup>5</sup>Current address: Center for Theragnosis, Korea Institute of Science and Technology, Seoul, Korea

**Supporting Information, Tables S1–S6**

**Table S1.** List of peptides that distinguish brain regions in the control group of samples.

| Peptide                                          | Protein                                                              | Accession | Mass*   | P-value  | Ave_dSTR± Std | Ave_NA±Std  | Ave_mPFC±Std |
|--------------------------------------------------|----------------------------------------------------------------------|-----------|---------|----------|---------------|-------------|--------------|
| SHYEEGPGKNLPFSVENKWRL                            | Cox7c protein                                                        | B2RYT3    | 2488.81 | 0.0015   | 14.38±0.95    | 42.86±6.26  | 52.02±6.38   |
| VVYPWTQRY                                        | Hemoglobin subunit beta-1                                            | P02091    | 1211.95 | 0.0271   | 18.45±4.23    | 40.3±14.27  | 47.05±12.98  |
| LVVYPWTQRY                                       | Hemoglobin subunit beta-1                                            | P02091    | 1325.14 | 0.0351   | 25.11±7.67    | 59.57±21.93 | 79.74±29.02  |
| VLLPKKTESHHKAKGK                                 | Histone H2A type 1                                                   | P02262    | 1801.47 | 0.0014   | 29.34±0.98    | 24.22±5.5   | 17.15±1.76   |
| acASQKRPSQRHGSKY                                 | Myelin basic protein S                                               | P02688    | 1672.24 | 0.0017   | 24.63±2.66    | 12.58±2.14  | 8.57±0.76    |
| acASQKRPSQRHGSKYL                                | Myelin basic protein S                                               | P02688    | 1785.57 | 0.0027   | 112.35±20.02  | 27.8±7.09   | 10.29±2.63   |
| acASQKRPSQRHGSKYLA                               | Myelin basic protein S                                               | P02688    | 1857.12 | 0.0007   | 58±4.56       | 21.5±4.72   | 11.43±1.33   |
| IVTPRTPPPSQGKGRGLSL                              | Myelin basic protein S                                               | P02688    | 1962.44 | 0.0339 † | 44.66±1.18    | 16.27±3.31  | 10.55±1.39   |
| SLPQKSQRTQDENPVVHF                               | Myelin basic protein S                                               | P02688    | 2110.91 | 0.0339 † | 29.01±1.75    | 7.7±1.86    | 5.18±1.22    |
| SLPQKSQRTQDENPVVHFFK                             | Myelin basic protein S                                               | P02688    | 2386.5  | 0.0339 † | 38.79±4.3     | 10.96±2.82  | 8.17±2.16    |
| AacSQKRPSQRHGSKYLATASTM<br>DHARHGFLPRHRDTGIL     | Myelin basic protein S                                               | P02688    | 4329.1  | 0.0142   | 14.95±5.31    | 6.14±1.94   | 1.9±1.13     |
| APVADGVEKKEGD                                    | Neuromodulin                                                         | P07938    | 1314.27 | 0.0017   | 7.81±0.55     | 16.71±2.1   | 20.91±2.48   |
| FADKVPKTAENF                                     | Peptidyl-prolyl cis-trans isomerase<br>A                             | P10111    | 1367.85 | 0.0002   | 26.67±1.53    | 11±2.91     | 5.3±1.48     |
| KSRHEEHERPE                                      | Cytochrome c oxidase subunit 6A1,<br>mitochondrial                   | P10818    | 1433.3  | 0.0039   | 20.89±0.8     | 11.44±2.89  | 9.21±2.82    |
| acSQADFDKAAEEVKRLKTQPTD<br>EEML                  | Acyl-CoA-binding protein                                             | P11030    | 2923.18 | 0.0133   | 9.28±1.03     | 28.84±6.7   | 35.88±12.44  |
| RVAPPGLTQIPQIQKTE                                | Na/K ATPase subunit beta-2                                           | P13638    | 1877.02 | 0.0647   | 38.34±2.75    | 37.62±5.68  | 50.62±6.56   |
| DRVAPPGLTQIPQIQKTE                               | Na/K ATPase subunit beta-2                                           | P13638    | 1991.52 | 0.0047   | 19.67±0.41    | 12.06±1.81  | 14.5±2.01    |
| acASSDIQVKELEKRASGQFEL                           | Stathmin                                                             | P13668    | 2349.42 | 0.0339 † | 23.53±4.42    | 37.97±3.83  | 115.02±16.27 |
| IRNMFPPNLVE                                      | Excitatory amino acid transporter 1                                  | P24942    | 1330.15 | 0.0011   | 17.32±2.7     | 51.18±6.04  | 61.05±8.08   |
| VPPVQVSPLIKFGRYSALIL                             | ATP synthase subunit e,<br>mitochondrial                             | P29419    | 2197.81 | 0.0089   | 10.86±1.95    | 35.53±14.63 | 57.86±12.44  |
| IRNLFPENL                                        | (1)                                                                  | P31596    | 1115.86 | 0.0041   | 15.79±2.31    | 38.25±5.77  | 56.55±12.97  |
| HAHKLRVDPVNF                                     | Glutamate/aspartate transporter 2                                    | P31596    | 1343.17 | 0.0039   | 28.08±3.08    | 46.01±4.98  | 64.83±10.73  |
| acSGTNNVAQARKLVEQL                               | Guanine nucleotide-binding protein<br>G(I)/G(S)/G(O) subunit gamma-7 | P43425    | 1770.75 | 0.0011   | 18.03±1.77    | 10.14±2.64  | 3.74±0.65    |
| acSDKPDMAEIEKFDKSKLKKTTET<br>QEKNLPSKETIEQEQAGES | Thymosin beta-4                                                      | P62329    | 4965.15 | 0.0014   | 22.78±8.24    | 129.39±23.7 | 148.52±23.98 |

|                                        |                                                              |        |         |          |            |             |              |
|----------------------------------------|--------------------------------------------------------------|--------|---------|----------|------------|-------------|--------------|
| acADEIAKAQVAQPGGDTIFGKIIR<br>KEIPAKIIF | Histidine triad nucleotide-binding<br>protein 1              | P62959 | 3478.89 | 0.0302   | 14.02±6.78 | 99.57±66.88 | 176.52±71.49 |
| MQLKPMINPEMLN                          | Neuron cytoplasmic protein 9.5                               | Q00981 | 1685.78 | 0.0193   | 19.47±0.87 | 15.77±1.27  | 16.59±2.37   |
| ILDIPLDGPGANAAAAKIQA                   | Neurogranin                                                  | Q04940 | 1976.56 | 0.0339 † | 28.89±2.26 | 9.71±2.01   | 5.89±1.48    |
| LLKNSPLVSRRTL                          | Malate dehydrogenase                                         | Q0QF43 | 1453.41 | 0.0083   | 32.81±5.32 | 20.75±5.72  | 13.05±2.43   |
| PSQDSSMPYAPYVEPSAGSD                   | Synaptogyrin-1                                               | Q62877 | 2083.27 | 0.0178   | 13.16±1.07 | 14.51±5.15  | 24.92±3.9    |
| FRKFQKKKAG                             | PEP-19                                                       | Q8CHN7 | 1237.99 | 0.0277   | 10.85±3.05 | 5.77±0.94   | 4.27±0.85    |
| FRKFQKKKAGSQS                          | PEP-19                                                       | Q8CHN7 | 1540.47 | 0.0002   | 74.69±4.05 | 43.83±10.85 | 14.16±2.91   |
| IDMDAPETERAAVAIQSQ                     | PEP-19                                                       | Q8CHN7 | 1945.97 | 0.0339 † | 39.19±4.21 | 10.36±1.7   | 7.62±1.27    |
| DIDMDAPETERAAVAIQSQ                    | PEP-19                                                       | Q8CHN7 | 2061.14 | 0.0339 † | 49.09±5.69 | 14.04±3     | 9.65±2.72    |
| AAPIHPDVVML                            | Glutamate transporter GLT1b                                  | Q8K5B5 | 1161.94 | 0.0347   | 4.01±0.39  | 7.2±1.56    | 6.22±1.6     |
| YYSSGSSSPTHAKSAH                       | Claudin-11                                                   | Q99P82 | 1766.6  | 0.0149   | 12.12±2.32 | 16.99±6.18  | 5.67±1.32    |
| RSSLGAKMVAI                            | Regulating synaptic membrane<br>exocytosis protein 3 (RIM 3) | Q9JIR3 | 1135    | 0.0041   | 11.6±2.17  | 60.57±16.24 | 56.33±10.45  |
|                                        | unknown                                                      |        | 915.61  | 0.0225   | 1.24±0.16  | 5±1.65      | 4.17±1.66    |
|                                        | unknown                                                      |        | 918.54  | 0.0513   | 2.68±0.84  | 5.62±2.08   | 6.58±2.29    |
|                                        | unknown                                                      |        | 931.54  | 0.0193   | 0.69±0.12  | 2.74±0.71   | 3.25±2.88    |
|                                        | unknown                                                      |        | 1002.69 | 0.0142   | 5.7±0.72   | 12.71±3.79  | 16.85±3.86   |
|                                        | unknown                                                      |        | 1150.82 | 0.0025   | 2.14±0.17  | 8.24±1.47   | 9.23±1.41    |
|                                        | unknown                                                      |        | 1171.13 | 0.0142   | 6.49±0.45  | 13.19±2.12  | 10.41±2.82   |
|                                        | unknown                                                      |        | 1200.97 | 0.0174   | 5.51±0.43  | 7.85±1.14   | 9.13±1.57    |
|                                        | unknown                                                      |        | 1253.91 | 0.0141   | 16.43±2.57 | 13.67±3.06  | 8.23±1.79    |
|                                        | unknown                                                      |        | 1422.36 | 0.0014   | 9.91±0.6   | 17.84±1.25  | 20.46±3.97   |
|                                        | unknown                                                      |        | 1471.22 | 0.0011   | 42.14±2.83 | 18.39±4.85  | 12.64±4.91   |
|                                        | unknown                                                      |        | 1524.39 | 0.0041   | 12.18±1.9  | 22.12±2.83  | 20.48±1.47   |
|                                        | unknown                                                      |        | 1628.38 | 0.0012   | 10.27±1.01 | 18.61±0.29  | 17.7±1.74    |
|                                        | unknown                                                      |        | 1668.29 | 0.0013   | 16.62±1.33 | 10.15±0.98  | 8.12±0.55    |
|                                        | unknown                                                      |        | 1694.62 | 0.0013   | 16.5±2.29  | 30.81±3.43  | 52.5±6.5     |
|                                        | unknown                                                      |        | 1717.39 | 0.0339 † | 25.78±2.1  | 8.11±0.51   | 5.62±0.48    |
|                                        | unknown                                                      |        | 1817.83 | 0.0174   | 16.33±1.73 | 10.82±2.44  | 8.46±3.14    |
|                                        | unknown                                                      |        | 1889.5  | 0.0344 † | 26.93±2.18 | 10.18±0.47  | 9.65±1.11    |
|                                        | unknown                                                      |        | 1900.74 | 0.0039   | 9.3±1.06   | 14.12±0.92  | 16.11±2.04   |
|                                        | unknown                                                      |        | 2021.04 | 0.0073   | 11.42±1.17 | 21.44±2.73  | 19.36±3.82   |
|                                        | unknown                                                      |        | 2044.33 | 0.0127   | 17.89±1.04 | 19.81±1.83  | 27.75±3.13   |
|                                        | unknown                                                      |        | 2048.9  | 0.0622   | 8.22±1.27  | 9.83±2.08   | 11.45±1.38   |
|                                        | unknown                                                      |        | 2055.2  | 0.0174   | 7.58±0.47  | 10±1.2      | 10.34±1.17   |

|         |         |        |             |             |             |
|---------|---------|--------|-------------|-------------|-------------|
| unknown | 2152.5  | 0.0054 | 21.4±1.97   | 16.32±2.68  | 12.76±1.41  |
| unknown | 2168.16 | 0.0091 | 20.38±1.46  | 60.58±13.81 | 79.45±20.03 |
| unknown | 2224.8  | 0.0344 | 10.61±1.55  | 12.74±2.3   | 25.01±6.72  |
| unknown | 2238.11 | 0.0014 | 42.58±3.78  | 23.86±3.87  | 15.28±4.56  |
| unknown | 2418.8  | 0.0162 | 57.36±8.45  | 86.99±9.66  | 99.38±22.37 |
| unknown | 2472.83 | 0.0142 | 6.1±0.6     | 14.33±3.39  | 18.71±5.04  |
| unknown | 2482.83 | 0.0174 | 3.35±0.44   | 10.05±3.86  | 12.04±3.27  |
| unknown | 2539.93 | 0.0111 | 6.86±0.33   | 17.57±3.99  | 24.36±6.13  |
| unknown | 2678.88 | 0.0581 | 7.32±0.54   | 12.15±2.72  | 12.41±4.63  |
| unknown | 2714.86 | 0.026  | 3.98±0.19   | 9.78±3.92   | 14.03±4.3   |
| unknown | 2810.1  | 0.0377 | 4.79±0.42   | 9.16±2.21   | 11.29±4.8   |
| unknown | 2969.04 | 0.0493 | 1.81±0.28   | 8.68±3.99   | 18.72±12.16 |
| unknown | 2985.44 | 0.0084 | 14.56±1.78  | 51.54±10.65 | 48.77±14.1  |
| unknown | 3050.1  | 0.0039 | 24.86±3.36  | 18.23±4.54  | 7.3±3.23    |
| unknown | 3056.46 | 0.0124 | 3.37±0.57   | 18.69±4.9   | 16.24±6.14  |
| unknown | 3156.08 | 0.0038 | 10.34±2.39  | 16.28±2.35  | 5.02±1.68   |
| unknown | 3203.59 | 0.0174 | 3.64±1.58   | 16.65±10.26 | 27.7±8.35   |
| unknown | 3434.9  | 0.0194 | 4.2±1.76    | 32.71±21.93 | 52.07±17.55 |
| unknown | 3924.75 | 0.0056 | 3.01±0.6    | 10.35±1.87  | 12.3±3.78   |
| unknown | 4180.12 | 0.0155 | 2.05±0.76   | 25.05±8.64  | 26.35±11.74 |
| unknown | 4748.69 | 0.013  | 78.62±20.92 | 80.44±13.51 | 39.66±6.2   |

\* **Mass** is defined as a centroid of the average peak of protonated molecular ion found on cumulative processed group spectrum in ClinPro Tools.

<sup>F</sup> p-value corrected for not normally distributed data.

**ac** = acetylation.

**Table S2.** List of peptides differentially detected in the NA of rats treated with 3 mg chronic AMPH.

| Peptide                                            | Protein          | Accession | Mass    | p-value | NA (saline±SD) | NA (AMPH±SD) | Ratio |
|----------------------------------------------------|------------------|-----------|---------|---------|----------------|--------------|-------|
| acSDKPDMAEIEKFDKSKLKKTTETQ<br>EKNPLPSKETIEQEKQAGES | Thymosin beta-4  | P62329    | 4965.24 | 0.01    | 127.04±23.06   | 317.35±82.93 | 2.5   |
| acADKPDMGEIASFDKAKLKKTTET<br>QEKNTLPTKETIEQEKRSEIS | Thymosin beta-10 | P63312    | 4938.23 | 0.016   | 8.78±1.74      | 23.24±7.37   | 2.6   |
| acASSDIQVKELEKRASGQFEL                             | Stathmin         | P13668    | 2349.47 | 0.045   | 37.4±3.63      | 51.7±9.31    | 1.4   |
|                                                    | unknown          |           | 2483.03 | 0.045   | 9.92±3.8       | 21.43±6.38   | 2.2   |
|                                                    | unknown          |           | 2985.55 | 0.05    | 50.47±10.25    | 77.5 13.76   | 1.5   |

**Mass** is the centroid of the average protonated molecular ion found on the cumulative processed group spectrum.

The **p-value** is corrected for non-normally distributed data.

**Ratio** is calculated from the maximum intensity for each peak on the average group spectrum, AMPH/saline.

**ac** = acetylation.

**Table S3.** List of peptides differentially detected in the dSTR of rats treated with 3 mg chronic AMPH.

| Peptide             | Protein                    | Accession | Mass    | p-value | dSTR (saline $\pm$ SD) | dSTR (AMPH $\pm$ SD) | Ratio |
|---------------------|----------------------------|-----------|---------|---------|------------------------|----------------------|-------|
| acASQKRPSQRHGSKY    | Myelin basic protein S     | P02688    | 1672.44 | 0.061   | 23.92 $\pm$ 2.65       | 18.06 $\pm$ 3.51     | 0.8   |
| RVAPPGLTQIPQIQKTE   | Na/K ATPase subunit beta-2 | P13638    | 1877.08 | 0.026   | 38.08 $\pm$ 2.66       | 46.71 $\pm$ 4.89     | 1.2   |
| DIDMDAPETERAAVAIQSQ | PEP-19                     | Q8CHN7    | 2061.25 | 0.061   | 48.25 $\pm$ 5.49       | 61.95 $\pm$ 9.84     | 1.3   |
|                     | unknown                    |           | 1471.33 | 0.006   | 41.38 $\pm$ 2.9        | 55.33 $\pm$ 5.82     | 1.3   |
|                     | unknown                    |           | 1519.15 | 0.026   | 17.34 $\pm$ 0.9        | 21.17 $\pm$ 2.21     | 1.2   |
|                     | unknown                    |           | 1799.98 | 0.001   | 28.83 $\pm$ 1.07       | 36.66 $\pm$ 2.37     | 1.3   |
|                     | unknown                    |           | 2151.91 | 0.026   | 20.1 $\pm$ 1.83        | 29.2 $\pm$ 5.9       | 1.4   |
|                     | unknown                    |           | 2238.4  | 0.026   | 40.11 $\pm$ 3.62       | 77.41 $\pm$ 23.4     | 1.9   |
|                     | unknown                    |           | 3156.1  | 0.034   | 10.07 $\pm$ 2.37       | 22.38 $\pm$ 8.66     | 2.2   |

**Mass** is the centroid of the average protonated molecular ion found on the cumulative processed group spectrum.

The **p-value** is corrected for non-normally distributed data.

**Ratio** is calculated from the maximum intensity for each peak on the average group spectrum, AMPH/saline.

**ac** = acetylation.

**Table S4.** List of peptides differentially detected in the mPFC of rats treated with 3 mg chronic AMPH.

| Peptide                                            | Protein                                      | Accession | Mass    | p-value | mPFC (saline±SD) | mPFC (AMPH±SD) | Ratio |
|----------------------------------------------------|----------------------------------------------|-----------|---------|---------|------------------|----------------|-------|
| SHYEEGPGKNLPFSVENKWRL                              | Cox7c protein                                | B2RYT3    | 2488.72 | 0.05    | 50.84±6.11       | 34.76±11.86    | 0.7   |
| KLGGDRSRGSPMAR                                     | Myelin basic protein S                       | P02688    | 1575.24 | 0.06    | 16.66±1.41       | 13.34±2.6      | 0.8   |
| APVADGVEKKEGD                                      | Neuromodulin                                 | P07936    | 1314.23 | 0.05    | 17.94±2.5        | 12.67±2.69     | 0.7   |
| RVAPPGLTQIPQIQKTE                                  | Na/K ATPase subunit beta-2                   | P13638    | 1877.05 | 0.04    | 49.98±6.66       | 33.4±8.62      | 0.7   |
| acSDKPDMAEIEKFDKSKLKKTTETQ<br>EKNPLPSKETIEQEKQAGES | Thymosin beta-4                              | P62329    | 4965.16 | 0.04    | 145.17±23.18     | 271.67±100.11  | 1.9   |
| acADEIAKAQVAQPGGDTIFGKIIRK<br>EIPAKIIF             | Histidine triad nucleotide-binding protein 1 | P62959    | 3478.95 | 0.04    | 172.74±69.47     | 346.37±79.36   | 2     |
| acADKPDMGEIASFDKAKLKKTTET<br>QEKNLPTKETIEQEKRSEIS  | Thymosin beta-10                             | P63312    | 4938.08 | 0.06    | 10.55±2.35       | 19.64±8.04     | 1.9   |
| PSQDSSMPYAPYVEPSAGSD                               | Synaptogyrin-1                               | Q62877    | 2083.33 | 0.06    | 25.16±3.64       | 17.94±4.19     | 0.7   |
|                                                    | unknown                                      |           | 1518.69 | 0.04    | 21.3±0.96        | 17.51±2.88     | 0.8   |
|                                                    | unknown                                      |           | 1604.66 | 0.03    | 20.31±1.93       | 14.52±2.86     | 0.7   |
|                                                    | unknown                                      |           | 1619.46 | 0.02    | 11.73±0.74       | 8.96±1.32      | 0.8   |
|                                                    | unknown                                      |           | 1694.69 | 0.04    | 52.04±6.47       | 36.22±6.14     | 0.7   |
|                                                    | unknown                                      |           | 1748.84 | 0.05    | 9.43±1.04        | 6.9±1.71       | 0.7   |
|                                                    | unknown                                      |           | 1779.96 | 0.04    | 31.24±4.74       | 20.34±5.29     | 0.7   |
|                                                    | unknown                                      |           | 1900.81 | 0.04    | 16.06±1.97       | 11.17±1.49     | 0.7   |
|                                                    | unknown                                      |           | 1936.86 | 0.03    | 11.88±0.98       | 8.88±1.47      | 0.7   |
|                                                    | unknown                                      |           | 1991.98 | 0.02    | 14.41±1.87       | 8.03±1.9       | 0.6   |
|                                                    | unknown                                      |           | 2044.46 | 0.03    | 27.61±2.87       | 19.75±2.96     | 0.7   |
|                                                    | unknown                                      |           | 2048.84 | 0.02    | 10.64±1.4        | 5.42±1.27      | 0.5   |
|                                                    | unknown                                      |           | 2055.16 | 0.02    | 10.3±1.09        | 5.93±0.85      | 0.6   |
|                                                    | unknown                                      |           | 3056.61 | 0.05    | 16.15±5.91       | 33.8±13.95     | 2.1   |

|  |         |  |         |      |             |              |     |
|--|---------|--|---------|------|-------------|--------------|-----|
|  | unknown |  | 3203.65 | 0.02 | 27.05±8.03  | 54.14±12.91  | 2   |
|  | unknown |  | 3219.76 | 0.02 | 6.44±1.93   | 13.82±3      | 2.1 |
|  | unknown |  | 3316.87 | 0.03 | 10.37±3.89  | 21.67±4.9    | 2.1 |
|  | unknown |  | 3434.95 | 0.02 | 50.83±16.91 | 112.93±31.13 | 2.2 |
|  | unknown |  | 3582.74 | 0.02 | 6.19±1.45   | 11.35±2.6    | 1.8 |
|  | unknown |  | 3626.18 | 0.04 | 9.51±4.5    | 20.95±5.96   | 2.2 |
|  | unknown |  | 4180.21 | 0.04 | 25.7±11.34  | 55.86±16.46  | 2.2 |

**Mass** is the centroid of the average protonated molecular ion found on the cumulative processed group spectrum.

The **p-value** is corrected for non-normally distributed data.

**Ratio** is calculated from the maximum intensity for each peak on the average group spectrum, AMPH/saline.

**ac** = acetylation.



**Table S5.** List of peptides identified by capLC-ESI-IT-MS/MS from the AMPH treated samples by different bioinformatics algorithms.

| Peptide                       | Protein                                                 | Accession | Mr (calc) | $\Delta M$ , Da | PEAKS | MASCOT |
|-------------------------------|---------------------------------------------------------|-----------|-----------|-----------------|-------|--------|
| YEMPSEEGYQDYEPEA*             | Alpha-synuclein 1                                       | P37377-1  | 1935.736  | 0.250           | Y     |        |
| PSSEAYEMPSEEGYQDYEPEA*        | Alpha-synuclein 2                                       | P37377-2  | 2406.932  | 0.047           | Y     |        |
| *VPPVQVSPLIKF                 | ATPsynthase, e chain , mitochondrial                    | P29419    | 1322.796  | 0.309           | Y     |        |
| YYSSGSSSPHAKSAH               | Claudin 11                                              | Q6IRG7    | 1764.807  | 0.314           | Y     | Y      |
| acASGVAVSDGVKVFNDM            | Cofilin, non-muscle isoform                             | P45592    | 1749.861  | 0.405           | Y     | Y      |
| TVLKYLPGPLQDM                 | Complexin-2                                             | P84087    | 1473.790  | 0.596           | Y     |        |
| IEVGA(ssC)NSAG(ssC)GPSSDVIET  | Contactin-1                                             | Q63198    | 1905.824  | 0.202           | Y     |        |
| SHLESSYKKR                    | Cytochrom C oxidase                                     | P80433    | 1275.657  | 0.388           | Y     |        |
| KSRHEEHERPE                   | Cytochrome c oxidase subunit 6A1, mitochondrial, P10818 | P10818    | 1432.681  | 0.394           | Y     | Y      |
| AGIKKKGERADLIA                | Cytochrome C, rat,                                      | P62898    | 1468.872  | 0.402           | Y     | Y      |
| KANAECTSGTSIKTVKIKKE          | H+-transporting two-sector ATPase, epsilon chain        | P29418    | 2160.248  | 0.081           | Y     | Y      |
| HVEDLPGALSTLSDL               | Hemoglobin alpha                                        | P01946    | 1565.794  | 0.462           | Y     | Y      |
| FQKVAVAGVASALAHKYH            | Hemoglobin beta-2                                       | P11517    | 1825      | 0.417           | Y     | Y      |
| VLLPKKTESHHKAKGK              | Histone H2A1                                            | P02262    | 1800.073  | 0.225           | Y     | Y      |
| AVRLLLPGELAKHAVSEGTKAVTKYTSSK | Histone H2B                                             | Q00715    | 3053.724  | 0.349           | Y     | Y      |
| SEGTKAVTKYTSSK                | Histone H2B                                             | Q00715    | 1527.778  | -0.126          | Y     | Y      |
| KQVHPDTGISSKAMGIMNSF          | Histone H2B type 1                                      | Q00715    | 2147.050  | 0.155           | Y     |        |
| KLNPPDESQPGCMSCCK             | Hras protein                                            | Q5RJJ8    | 1661.721  | -0.274          | Y     | Y      |
| AEKAAVNGL                     | II beta-globin                                          | Q6LD44    | 871.476   | 0.214           | Y     | Y      |
| AKVAVLGASGGIGQPLSL            | Malate dehydrogenase, mitochondrial                     | p04636    | 1750.035  | 0.430           | Y     |        |
| SPQLATLADEVASLAKQG.L*         | Microtubule-associated protein tau                      | P19332    | 1884.979  | 0.352           | Y     | Y      |
| RDTGILDSIGRF                  | Myelin basic protein                                    | P02688-4  | 1348.710  | 0.736           | Y     |        |
| IVTPRTPPPSQGKGRGL             | Myelin basic protein                                    | P02688    | 1760.006  | 0.380           | Y     |        |
| IVTPRTPPPSQGKGRGLS            | Myelin basic protein                                    | P02688    | 1847.038  | 0.228           | Y     |        |
| TGILDSIGRF                    | Myelin basic protein                                    | P02688    | 1077.582  | 0.303           | Y     | Y      |
| KLGGRDSRSGSPMAR               | Myelin basic protein                                    | P02688    | 1573.811  | 0.258           | Y     | Y      |
| DAQGTLKIFKLGGRD               | Myelin basic protein                                    | P02688    | 1704.916  | 0.465           | Y     | Y      |
| SRFSWGGDRSRSGSPM              | Myelin basic protein                                    | P02688    | 1768.806  | 0.305           | Y     | Y      |
| acASQKRPSQRHGSKYL             | Myelin basic protein                                    | P02688    | 1783.944  | 0.201           | Y     | Y      |
| KSQRTQDENPVVHFF               | Myelin basic protein                                    | P02688    | 1829.917  | 0.163           | Y     | Y      |
| SRFSWGGDRSRSGSPMA             | Myelin basic protein                                    | P02688    | 1839.843  | 0.06            | Y     | Y      |

|                            |                                   |        |          |        |                    |                    |
|----------------------------|-----------------------------------|--------|----------|--------|--------------------|--------------------|
| IVTPRTPPPSQGKGRGLSL        | Myelin basic protein              | P02688 | 1960.122 | 0.168  | Y                  | Y                  |
| SLPQKSQRTQDENPVVHFF        | Myelin basic protein              | P02688 | 2256.129 | 0.158  | Y                  | Y                  |
| ILDIPLDDPGANAAAAKIQASF     | Neurogranin                       | Q04940 | 2210.158 | 0.157  | Y                  | Y                  |
| APAAEAEAKEKD               | Neuromodulin                      | P07936 | 1228.594 | 0.472  | Y                  |                    |
| APVADGVEKKEGD              | Neuromodulin                      | P07938 | 1313.646 | 0.519  | Y                  |                    |
| APAAEAEAKEKDD              | Neuromodulin                      | P07937 | 1343.621 | 0.445  | Y                  |                    |
| *VDFPWAAVDNM               | Neuronal growth regulator 1,      | Q9Z0J8 | 1263.559 | 0.586  | Y                  |                    |
| FRKFQKKKAG                 | PEP-19                            | P63055 | 1236.745 | 0.315  | Y                  | Y                  |
| DIDMDAPETERA               | PEP-19                            | P63055 | 1361.577 | 0.489  | Y                  |                    |
| RKFQKKKAGSQS               | PEP-19                            | P63055 | 1391.8   | 0.341  | Y                  | Y                  |
| FRKFQKKKAGSQS              | PEP-19                            | P63055 | 1538.868 | 0.291  | Y                  | Y                  |
| TphPGYphSphSGGGGGSGYQDLGTS | ProSAPiP1                         | Q8K1Q4 | 2100.675 | -0.296 | Y                  | Y                  |
| VHLLHQLPRAD                | Protein tweety homolog 1          | POC5X8 | 1297.725 | -0.081 | Y                  | Y                  |
|                            | Protein whose mRNA is enriched in |        |          |        |                    |                    |
| *acSFFKTLVSPKNTETKKD       | synaptosomes 2                    | Q3ZB98 | 2011.063 | 0.283  | Y                  |                    |
| EDSPGLKVGVPVPLVM           | Sec61 beta subunit                | B2RZD1 | 1506.848 | 0.478  | Y                  |                    |
| DTVLKYLPGPLQDM             | Synaphin-1                        | P84087 | 1588.817 | 0.459  | Y                  | Y                  |
| VGITKAAPILF                | Synaptic vesicle glycoprotein 2A  | Q02563 | 1128.691 | 0.595  | Y                  |                    |
| *acMEGGAYGAGKAGGAFD        | Synaptogyrin-1                    | Q62876 | 1499.635 | 0.043  | Y                  |                    |
| PSQDSSMPYAPYVEPSAGSD       | Synaptogyrin-1                    | Q62877 | 2083.868 | 0.117  | Y                  |                    |
| *acMDVVNQLVAGGQF           | Synaptophysin                     | P07825 | 1418.686 | 0.539  | Y                  |                    |
| FEYPFRRRLHQVY              | Synaptophysin                     | P07825 | 1497.741 | 0.725  | Y                  |                    |
| *VKLIESKEAFQEALAAAGDKL     | Thioredoxin                       | P11232 | 2230.221 | 0.18   | Y                  | Y                  |
| SLTREKKKHVL                | Thy-1 membrane glycoprotein       | P01830 | 1337.814 | 0.389  | Y                  | Y                  |
| SLTREKKKHVLSGTLGVPEHTY     | Thy-1 membrane glycoprotein       | P01830 | 2479.355 | 0.455  | Y                  | Y                  |
| <b>56 peptides</b>         | <b>35 proteins</b>                |        |          |        | <b>56 peptides</b> | <b>32 peptides</b> |

Masses are defined as calculated monoisotopic masses of molecular ions.

\* denotes the location of N-or C-termini of the proteins.

**ac** and **ph** = acetylation and phosphorylation, respectively.

PEAKS denotes peptides identified in the automatic database search using Peaks Studio 4.6 software.

MASCOT denotes peptides identified in the automatic database search using local MASCOT server.

$\Delta M$  indicates difference between calculated and experimental peptides mass.

**Table S6.** List of peptides identified by nanoLC-ESI-FTICR-MS/MS from the AMPH treated samples.

| Sequence                                                          | Position  | Protein Description                     | Accession Number | Mr (calc) | $\Delta M$ , ppm | E-value              |
|-------------------------------------------------------------------|-----------|-----------------------------------------|------------------|-----------|------------------|----------------------|
| acASATRVIQKLRNWSGQDLQAKLQLR                                       | (2-27)    | Ndufa7 protein                          | A9UMV9           | 2992.67   | -0.5             | $8 \times 10^{-21}$  |
| SHYEEGPGKNLPFSVENKWRL                                             | (17-37)   | Cox7c protein                           | B2RYT3           | 2486.23   | -1.0             | $1 \times 10^{-18}$  |
| KHESQVDSVVKDKKAKETADAIKSKVKKATVN                                  | (147-180) | Receptor expression-enhancing protein 5 | B2RZ37           | 3724.00   | 0.0              | $8 \times 10^{-24}$  |
| SVVKDKKAKETADAIKSKVKKATVNL                                        | (154-181) | Receptor expression-enhancing protein 5 | B2RZ37           | 3013.70   | -0.9             | $1 \times 10^{-57}$  |
| EREASPQFPAAQKPLLSL                                                | (333-350) | Ttyh1 protein                           | B4F773           | 1981.06   | -0.4             | $4 \times 10^{-45}$  |
| FYLPGQAEGRSSNTYTL                                                 | (283-300) | CD166 antigen                           | O35112           | 2016.00   | -0.5             | $4 \times 10^{-11}$  |
| FAAFPTTKTYFSHIDVSPGSAQVKAHGKKVADALAKA<br>ADHVEDLPGALSTLSDL        | (34-87)   | Hemoglobin subunit alpha-1/2            | P01946           | 5592.89   | -0.4             | $1 \times 10^{-22}$  |
| AAFPTTKTYFSHIDVSPGSAQVKAHGKKVADALAKAA<br>DHVEDLPGALSTLSDL         | (35-87)   | Hemoglobin subunit alpha-1/2            | P01946           | 5445.82   | -0.6             | $5 \times 10^{-35}$  |
| AAFPTTKTYFSHIDVSPGSAQVKAHGKKVADALAKAA<br>DHVEDLPGALSTLSDLHAHKLKRV | (35-95)   | Hemoglobin subunit alpha-1/2            | P01946           | 6402.35   | -1.2             | $4 \times 10^{-14}$  |
| FSHIDVSPGSAQVKAHGKKVADALAKAADHVEDLPGA<br>LSTLSDL                  | (44-87)   | Hemoglobin subunit alpha-1/2            | P01946           | 4465.32   | -0.8             | $1 \times 10^{-37}$  |
| FSHIDVSPGSAQVKAHGKKVADALAKAADHVEDLPGA<br>LSTLSDLHAHKLKRV          | (44-95)   | Hemoglobin subunit alpha-1/2            | P01946           | 5421.85   | -1.4             | $2 \times 10^{-102}$ |
| FSHIDVSPGSAQVKAHGKKVADALAKAADHVEDLPGA<br>LSTLSDLHAHKLKRVDPVN      | (44-98)   | Hemoglobin subunit alpha-1/2            | P01946           | 5732.02   | 1.8              | $2 \times 10^{-34}$  |
| FSHIDVSPGSAQVKAHGKKVADALAKAADHVEDLPGA<br>LSTLSDLHAHKLKRVDPVNFK    | (44-100)  | Hemoglobin subunit alpha-1/2            | P01946           | 6007.18   | -5.8             | $7 \times 10^{-22}$  |
| SHIDVSPGSAQVKAHGKKVADALAKAADHVEDLPGAL<br>STLSDLHAHKLKRV           | (45-95)   | Hemoglobin subunit alpha-1/2            | P01946           | 5274.79   | -1.8             | $1 \times 10^{-58}$  |
| SHIDVSPGSAQVKAHGKKVADALAKAADHVEDLPGAL<br>STLSDLHAHKLKRVDPVN       | (45-98)   | Hemoglobin subunit alpha-1/2            | P01946           | 5584.95   | -1.0             | $3 \times 10^{-10}$  |
| HIDVSPGSAQVKAHGKKVADALAKAADHVEDLPGALS<br>TLSDLHAHKLKRV            | (46-95)   | Hemoglobin subunit alpha-1/2            | P01946           | 5187.75   | 0.3              | $7 \times 10^{-17}$  |
| VSPGSAQVKAHGKKVADALAKAADHVEDLPGALSTLS<br>DLHAHKLKRV               | (49-93)   | Hemoglobin subunit alpha-1/2            | P01946           | 4608.49   | -0.2             | $4 \times 10^{-13}$  |
| VSPGSAQVKAHGKKVADALAKAADHVEDLPGALSTLS<br>DLHAHKLKRV               | (49-95)   | Hemoglobin subunit alpha-1/2            | P01946           | 4822.58   | 0.5              | $2 \times 10^{-63}$  |
| VSPGSAQVKAHGKKVADALAKAADHVEDLPGALSTLS<br>DLHAHKLKRVDPVN           | (49-98)   | Hemoglobin subunit alpha-1/2            | P01946           | 5132.75   | -0.5             | $1 \times 10^{-28}$  |
| VSPGSAQVKAHGKKVADALAKAADHVEDLPGALSTLS<br>DLHAHKLKRVDPVNFK         | (49-100)  | Hemoglobin subunit alpha-1/2            | P01946           | 5407.91   | 1.8              | $3 \times 10^{-16}$  |

|                                                                                                         |            |                                                                        |        |         |      |                                |
|---------------------------------------------------------------------------------------------------------|------------|------------------------------------------------------------------------|--------|---------|------|--------------------------------|
| VHLTDAEKA AVNGLW                                                                                        | (2-16)     | Hemoglobin subunit beta-1                                              | P02091 | 1622.84 | -0.2 | $2 \times 10^{-8}$             |
| VHLTDAEKA AVNGLWGKVNPPDDVGGEALG                                                                         | (2-30)     | Hemoglobin subunit beta-1                                              | P02091 | 2931.47 | -2.1 | $1 \times 10^{-7}$             |
| GKVNPPDDVGGEALGRLL                                                                                      | (17-33)    | Hemoglobin subunit beta-1                                              | P02091 | 1708.91 | -0.9 | $2 \times 10^{-54}$            |
| LAALGGNSNPSAKDIKKILDSVIEADDERLNKVISELN<br>GKNIE                                                         | (9-52)     | 60S acidic ribosomal protein P2                                        | P02401 | 4647.47 | 0.2  | $5 \times 10^{-8}$             |
| LAALGGNSNPSAKDIKKILDSVIEADDERLNKVISELN<br>GKNIED                                                        | (9-53)     | 60S acidic ribosomal protein P2                                        | P02401 | 4762.50 | 0.4  | $7 \times 10^{-21}$            |
| SQRTQDENPVVHFF                                                                                          | (101-114)  | Myelin basic protein S                                                 | P02688 | 1702.81 | -0.7 | $8 \times 10^{-26}$            |
| LTISELKPTYQDRVAPPGLTQIPQIQ                                                                              | (59-84)    | Sodium/potassium-transporting<br>ATPase subunit beta-1                 | P07340 | 2905.59 | -1.1 | $1 \times 10^{-12}$            |
| FEYPPFRLHQVY                                                                                            | (65-75)    | Synaptophysin (Major synaptic<br>vesicle protein p38)                  | P07825 | 1497.74 | -1.3 | $9 \times 10^{-10}$            |
| LQRQP PPPPPSAASPGATPGSAAASAERASTAAPVA<br>SPAAPSPGSSGGGGFFSSLSNAVKQTTAAAAATFSE<br>QVGGGSGGAGRGGAAARVL    | (25-116)   | Synapsin-1                                                             | P09951 | 8306.15 | -0.9 | 2.89E-09<br>$3 \times 10^{-9}$ |
| MTDLQRQP PPPPPSAASPGATPGSAAASAERASTA<br>APVASPAAPSPGSSGGGGFFSSLSNAVKQTTAAAAAT<br>FSEQVGGGSGGAGRGGAAARVL | (22-116)   | Synapsin-1                                                             | P09951 | 8653.27 | -0.8 | 9.06E-08<br>$9 \times 10^{-8}$ |
| HLPEQAFYMGPIEEAVAKADKLAEEHGS                                                                            | (501-529*) | ATP synthase subunit beta,<br>mitochondrial                            | P10719 | 3165.54 | -0.9 | $4 \times 10^{-12}$            |
| acSQADFDKAAEEVKRLKTQPTDEEML                                                                             | (2-26)     | Acyl-CoA-binding protein                                               | P11030 | 2920.41 | -0.6 | $4 \times 10^{-40}$            |
| IYSHFKQATVGDVNTDRPGLLDL                                                                                 | (28-50)    | Acyl-CoA-binding protein                                               | P11030 | 2558.31 | -1.7 | $3 \times 10^{-60}$            |
| VKLIESKEAFQEALAAAGDKL                                                                                   | (2-22)     | Thioredoxin.                                                           | P11232 | 2230.22 | -0.8 | $9 \times 10^{-42}$            |
| acASSDIQVKELEKRASGQAFEL                                                                                 | (2-22)     | Stathmin                                                               | P13668 | 2347.20 | -1.7 | $7 \times 10^{-55}$            |
| ITKAVAASKERSGVSLAALKKALAAAGY                                                                            | (44-71)    | Histone H1.2                                                           | P15865 | 2744.59 | -1.2 | $1 \times 10^{-52}$            |
| ITKAVAASKERSGVSLAALKKALAAAGYD                                                                           | (44-72)    | Histone H1.2                                                           | P15865 | 2859.62 | -1.0 | $5 \times 10^{-66}$            |
| ITKAVAASKERSGVSLAALKKALAAAGYDVEKNNSRIK<br>LGL                                                           | (44-84)    | Histone H1.2                                                           | P15865 | 4211.41 | 2.2  | $6 \times 10^{-30}$            |
| ITKAVAASKERSGVSLAALKKALAAAGYDVEKNNSRIK<br>LGLKSL                                                        | (44-87)    | Histone H1.2                                                           | P15865 | 4539.62 | 0.3  | $6 \times 10^{-78}$            |
| SLEPVAEELKSLGKDV                                                                                        | (77-94)    | Phosphoglycerate kinase 1                                              | P16617 | 1881.08 | -1.0 | $6 \times 10^{-12}$            |
| LEGKVLPGVDALS NV                                                                                        | (403-417*) | Phosphoglycerate kinase 1                                              | P16617 | 1509.84 | -0.9 | $8 \times 10^{-20}$            |
| IRNMFPPNLVE                                                                                             | (174-184)  | Excitatory amino acid transporter 1                                    | P24942 | 1328.69 | -0.6 | $2 \times 10^{-16}$            |
| SIDMVDPQLATLADEV SASLAKQGL                                                                              | (727-752*) | Microtubule-associated protein tau<br>(Neurofibrillary tangle protein) | P19332 | 2658.34 | -1.9 | $9 \times 10^{-47}$            |
| MVDSPQLATLADEV SASLAKQGL                                                                                | (730-752*) | Microtubule-associated protein tau<br>(Neurofibrillary tangle protein) | P19332 | 2343.2  | -0.8 | $2 \times 10^{-65}$            |
| VDSPQLATLADEV SASLAKQGL                                                                                 | (731-752*) | Microtubule-associated protein tau<br>(Neurofibrillary tangle protein) | P19332 | 2212.16 | -1.1 | $1 \times 10^{-12}$            |

|                                                                                                                      |            |                                                                     |        |         |      |                                  |
|----------------------------------------------------------------------------------------------------------------------|------------|---------------------------------------------------------------------|--------|---------|------|----------------------------------|
| SPQLATLADEVASLAKQGL                                                                                                  | (733-752*) | Microtubule-associated protein tau (Neurofibrillary tangle protein) | P19332 | 1998.06 | -1.1 | 9 x 10 <sup>-36</sup>            |
| M(ac)LS(ac)VAARSGPFAPVLSATSRGVAGALRPL<br>(Acetylation is potentially located at either Methionie or Serine residue.) | (1-29)     | Cytochrome b-c1 complex subunit Rieske, mitochondrial               | P20788 | 2893.60 | -0.8 | 6 x 10 <sup>-21</sup>            |
| VPPVQVSPLIKFGRYSALIL                                                                                                 | (2-21)     | ATP synthase subunit e, mitochondrial                               | P29419 | 2196.30 | -1.0 | 5 x 10 <sup>-10</sup>            |
| IVNTNVPRASVPEGFLSELQQLAQATGKPAQY                                                                                     | (5-37)     | Macrophage migration inhibitory factor                              | P30904 | 3526.84 | -1.4 | 1 x 10 <sup>-10</sup>            |
| TCIIWLAFLPIF                                                                                                         | (769-780)  | Metabotropic glutamate receptor 2                                   | P31421 | 1435.79 | 1.6  | 5 x 10 <sup>-16</sup>            |
| AEKTKAQVTNVGGAVVTGVTAVAQKTVEGAGNIAAAT<br>GFVKKD                                                                      | (56-98)    | Alpha-synuclein                                                     | P37377 | 4214.25 | -0.9 | 2.5E-76<br>3 x 10 <sup>-76</sup> |
| KTKAQVTNVGGAVVTGVTAVAQKTVEGAGNIAAATGF<br>VKKD                                                                        | (58-98)    | Alpha-synuclein                                                     | P37377 | 4014.18 | -0.2 | 1 x 10 <sup>-33</sup>            |
| acSGTNNVAQARKLVEQL                                                                                                   | (2-17)     | Guanine nucleotide-binding protein G(I)/G(S)/G(O) subunit gamma-7   | P43425 | 1768.94 | -1.2 | 2 x 10 <sup>-36</sup>            |
| acSGTNNVAQARKLVEQLRIEAG                                                                                              | (2-22)     | Guanine nucleotide-binding protein G(I)/G(S)/G(O) subunit gamma-7   | P43425 | 2295.23 | -1.6 | 2 x 10 <sup>-37</sup>            |
| FTAHIIPLK                                                                                                            | (297-306*) | Palmitoyl-protein thioesterase 1                                    | P45479 | 1185.69 | -1.0 | 2 x 10 <sup>-10</sup>            |
| VEFGSRVNVGGKTVKLIWDTAGQ                                                                                              | (43-67)    | Ras-related protein Rab-4B                                          | P51146 | 2687.44 | -1.7 | 1 x 10 <sup>-8</sup>             |
| PRLRQLQKSLAAATGKQELAKYF                                                                                              | (29-52)    | Somatostatin                                                        | P60042 | 2763.56 | -0.2 | 2 x 10 <sup>-8</sup>             |
| IEKFDKSKLKKTTETQEKNPLPSKETIEQEKQAG                                                                                   | (10-42)    | Thymosin beta-4                                                     | P62329 | 3829.05 | -1.7 | 7 x 10 <sup>-22</sup>            |
| IEKFDKSKLKKTTETQEKNPLPSKETIEQEKQAGES                                                                                 | (10-44*)   | Thymosin beta-4                                                     | P62329 | 4045.12 | -0.1 | 8 x 10 <sup>-9</sup>             |
| acADEIAKAQVAQPGGDTIFGKIIRKEIPAKIIF                                                                                   | (2-33)     | Histidine triad nucleotide-binding protein 1                        | P62959 | 3478.96 | -0.5 | 2 x 10 <sup>-47</sup>            |
| TIFGKIIRKEIPAKIIF                                                                                                    | (17-33)    | Histidine triad nucleotide-binding protein 1                        | P62959 | 1986.24 | -0.7 | 5 x 10 <sup>-9</sup>             |
| MQIFVKLTGKTITLEVEPSDTIENVKAKIQDKEGIPPD<br>QQRLIFAGKQLEDGRTLSDYNIQKESTLHLVL                                           | (1-71)     | Ubiquitin                                                           | P62989 | 8020.29 | -0.8 | 4 x 10 <sup>-14</sup>            |
| MQIFVKLTGKTITLEVEPSDTIENVKAKIQDKEGIPPD<br>QQRLIFAGKQLEDGRTLSDYNIQKESTLHLVLR                                          | (1-74)     | Ubiquitin                                                           | P62989 | 8445.57 | 0.5  | 6 x 10 <sup>-62</sup>            |
| MQIFVKLTGKTITLEVEPSDTIENVKAKIQDKEGIPPD<br>QQRLIFAGKQLEDGRTLSDYNIQKESTLHLVLR                                          | (1-76)     | Ubiquitin                                                           | P62989 | 8559.62 | 1.2  | 4 x 10 <sup>-29</sup>            |
| PSDTIENVKAKIQDKEGIPPDQQRLIFAGKQLEDGRTL<br>SDYNIQKESTLHLVLR                                                           | (19-74)    | Ubiquitin                                                           | P62989 | 6413.45 | -1.1 | 8 x 10 <sup>-15</sup>            |
| acMEFVMKQALGGATKDMGKMLGGDEEKD                                                                                        | (1-27)     | Complexin-1                                                         | P63041 | 2957.36 | -1.2 | 2 x 10 <sup>-45</sup>            |
| DIDMDAPETERAAVAIQSQF                                                                                                 | (31-50)    | Purkinje cell protein 4 (Brain-specific polypeptide PEP-19)         | P63055 | 2206.02 | -0.5 | 5 x 10 <sup>-18</sup>            |
| acAAKFESIGKFLAL                                                                                                      | (2-16)     | Prohibitin                                                          | P67779 | 1591.90 | -0.9 | 2 x 10 <sup>-19</sup>            |
| acMDFVMKQALGGATKDMGKMLGGEEEKD                                                                                        | (1-27)     | Complexin-2                                                         | P84087 | 2957.36 | 0.2  | 4 x 10 <sup>-17</sup>            |

|                                              |            |                                                                                   |        |         |      |                       |
|----------------------------------------------|------------|-----------------------------------------------------------------------------------|--------|---------|------|-----------------------|
| acAGQAFRKFLPLF                               | (2-13)     | Chaperonin 10                                                                     | P97601 | 1435.80 | -0.9 | 3 x 10 <sup>-24</sup> |
| KQVHPDTGISSKAMGIMNSF                         | (47-66)    | Histone H2B type 1                                                                | Q00715 | 2147.05 | -0.5 | 1 x 10 <sup>-25</sup> |
| MQLKPMEINPEMLN                               | (1-14)     | Ubiquitin carboxyl-terminal hydrolase isozyme L1 (Neuron cytoplasmic protein 9.5) | Q00981 | 1686.81 | -0.9 | 4 x 10 <sup>-11</sup> |
| ILDIPDDPGANAAAAKIQ                           | (16-34)    | Neurogranin                                                                       | Q04940 | 1905.02 | -0.5 | 1 x 10 <sup>-55</sup> |
| ILDIPDDPGANAAAAKIQA                          | (16-35)    | Neurogranin                                                                       | Q04940 | 1976.06 | -0.7 | 6 x 10 <sup>-9</sup>  |
| ILDIPDDPGANAAAAKIQAS                         | (16-36)    | Neurogranin                                                                       | Q04940 | 2063.09 | -1.1 | 1 x 10 <sup>-17</sup> |
| DIPLDDPGANAAAAKIQASF                         | (18-37)    | Neurogranin                                                                       | Q04940 | 1983.99 | -0.6 | 9 x 10 <sup>-60</sup> |
| IPLDDPGANAAAAKIQASF                          | (19-37)    | Neurogranin                                                                       | Q04940 | 1868.96 | -1.5 | 3 x 10 <sup>-35</sup> |
| DIDTAAKFIGAGAATVGVAG                         | (62-81)    | ATP synthase lipid-binding protein, mitochondrial                                 | Q06645 | 1803.94 | -0.9 | 3 x 10 <sup>-23</sup> |
| YSAASKQKRLDQVEKELLRVGQLLKD                   | (46-71)    | ATP synthase subunit O, mitochondrial                                             | Q06647 | 3014.69 | -1.0 | 2 x 10 <sup>-26</sup> |
| MTTVHAITATQKTVDGSPGKLRDGRGAAQNIIPAST         | (150-205)  | Glyceraldehyde-3-phosphate dehydrogenase                                          | Q0QEU1 | 5653.05 | -3.7 | 4 x 10 <sup>-32</sup> |
| GAAKAVGKVIPELNGKLTG                          |            |                                                                                   |        |         |      |                       |
| GPSGKLWRDGRGAAQNIIPASTGAAKAVGKVIPELNGKLTG    | (165-205)  | Glyceraldehyde-3-phosphate dehydrogenase                                          | Q0QEU1 | 4055.24 | -0.2 | 2 x 10 <sup>-9</sup>  |
| AKVAVLGASGGIGQPLSL                           | (4-21)     | Malate dehydrogenase                                                              | Q0QF43 | 1636.95 | -0.7 | 7 x 10 <sup>-61</sup> |
| LLKNSPLVSRLL                                 | (22-34)    | Malate dehydrogenase                                                              | Q0QF43 | 1452.90 | -0.6 | 8 x 10 <sup>-24</sup> |
| VKEGSEPPLKMTQESALIF                          | (266-284)  | Cell adhesion molecule 3                                                          | Q1WIM3 | 2103.09 | -0.8 | 5 x 10 <sup>-22</sup> |
| AALNGKGLGEISAATEF                            | (579-594)  | Ncam1 protein                                                                     | Q3T1H3 | 1647.85 | -1.0 | 4 x 10 <sup>-38</sup> |
| KQMKIMMERREEEHAKLMKALKKCK                    | (57-81)    | Clusterin-like protein 1                                                          | Q3ZRW7 | 3116.66 | 6.7  | 5 x 10 <sup>-10</sup> |
| TSVPPNAAHPMPAAALTNASGLGL                     | (849-873)  | Myeloid/lymphoid or mixed-lineage leukemia (Trithorax homolog, Drosophila)        | Q5PQL6 | 2344.18 | -1.5 | 6 x 10 <sup>-9</sup>  |
| PYEIKKVFASLPQVERGVSKILGGD                    | (2-26)     | WD repeat-containing protein 1                                                    | Q5RKI0 | 2729.51 | 0.1  | 4 x 10 <sup>-64</sup> |
| TPSAQAAFQKVAGVASALAHKYH                      | (124-147*) | 0 beta-2 globin                                                                   | Q62670 | 2451.30 | -0.2 | 4 x 10 <sup>-32</sup> |
| PGPTAPDPLKSQGPRGPQLPTVSPSPVMIPTVPHAEYIEGSpHP | (910-952*) | Microtubule-associated protein 6                                                  | Q63560 | 4475.22 | 0.7  | 1 x 10 <sup>-9</sup>  |
| ARVVAFMSNIPLLL                               | (164-178)  | Prosaposin                                                                        | Q6P7A4 | 1639.95 | -0.8 | 2 x 10 <sup>-26</sup> |
| SSLLEKGLDGAKKAVGGKLGKDAVEDLESVGKGA           | (63-110*)  | Dermcidin                                                                         | Q71DI1 | 4815.62 | -1.1 | 1 x 10 <sup>-59</sup> |
| VHDVKDVLDSVL                                 |            |                                                                                   |        |         |      |                       |
| IKAYMDSTLGPFILNVTSALLCSEALCSGRGRCVHRP        | (351-389)  | Hyaluronidase-1                                                                   | Q76HN1 | 4136.08 | 4.9  | 8 x 10 <sup>-11</sup> |
| S                                            |            |                                                                                   |        |         |      |                       |
| AAPIHPDVVML                                  | (67-77)    | Glutamate transporter GLT1b                                                       | Q8K5B5 | 1161.62 | -0.5 | 1 x 10 <sup>-9</sup>  |
| IRNLFPENL                                    | (172-180)  | Glutamate transporter GLT1b                                                       | Q8K5B5 | 1114.61 | -0.7 | 3 x 10 <sup>-10</sup> |
| TVEPNARQLVEIAARDIEKL                         | (69-89)    | L-type calcium channel alpha2/delta subunit                                       | Q8VHS9 | 2378.29 | -0.3 | 4 x 10 <sup>-14</sup> |
| APIKVGDTIPSVEVF                              | (53-67)    | Peroxisome oxidin-5, mitochondrial                                                | Q9R063 | 1570.86 | -0.9 | 9 x 10 <sup>-27</sup> |

|                                                      |        |                                                     |        |         |      |                     |
|------------------------------------------------------|--------|-----------------------------------------------------|--------|---------|------|---------------------|
| <b>ac</b> AVPPTYADLGKSARDVF                          | (2-18) | Voltage-dependent anion-selective channel protein 1 | Q9Z2L0 | 1847.94 | -0.6 | $7 \times 10^{-37}$ |
| <b>ac</b> ASQKRPSQRHGSKYLATASTMDHARHGFLPRHRD<br>TGIL | (2-39) | Myelin basic protein S                              | P02688 | 4325.22 | -1.2 | $2 \times 10^{-26}$ |
| <b>99 peptides</b>                                   |        | <b>58 proteins</b>                                  |        |         |      |                     |

Masses are defined as calculated monoisotopic masses of molecular ions.

\* denotes the location of the C-terminal of the proteins.

**ac** and **ph** = acetylation and phosphorylation, respectively.

$\Delta M$  = difference between calculated and experimental peptides mass.
